# Supplementary material for: The Impact of Sample Storage on Blood Methylation: Towards Assessing Myelin Gene Methylation as a Biomarker for Progressive Multiple Sclerosis
Source: MDPI journal article supplement (doi:10.3390/ijms25063468), 2024-03-19
Supplement: s1 [file s1]

## Supplementary information

**Supplementary Table S1:** Pyrosequencing primer list

| Target gene | Forward primer (5'-3')      | Reverse primer (5'-3')       | Sequencing primer (5'-3') |
|-------------|-----------------------------|------------------------------|---------------------------|
| MBP         | GTTTGGTAGGATGTTTATTTAGTTGA  | TCTATAACCCCATCACCCAACTCTC    | GGATGTTTATTTAGTTGATTAGG   |
| MAG         | AGGGTGATAGGGATGGAAGAT       | AAAAAAACACAAAAAACCTTATCAC    | GGAAAGAGTTAGGAGAATTTA     |
| CNTN2       | GAGGGGGGTGAGATAATAGT        | CCTACCAACTCTAAAATCTAAATACTCA | TGAGATAATAGTGATAGTTTGA    |
| BCAS1       | GGAGTATATAGTTGAGGGGGTTGATAG | CTCAAAAACCTAAACTCTAACCTAAATT | GGAAGTATAGTAGTTTGTTTATAAT |
| PAR3        | AGGGAGAGGGTAGGGTAGAAA       | CCCCTTCCCCTTTCTTTATC         | AGAAATTTAGTAGAGTAAGTTGTAG |

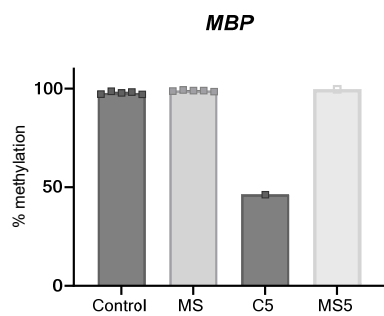

**Supplementary Figure S1:** To exclude the possibility of technical artifacts, we always included a control (C5) and an MS (MS5) sample from cohort 1 in the other experiments, consistently observing hypomethylation in the control sample.
